# Supplementary material for: Dexamethasone differentially depletes tumour and peripheral blood lymphocytes and can impact the efficacy of chemotherapy/checkpoint blockade combination treatment
Source: PubMed Central journal article supplement — Oncoimmunology. 2019 Jul 13;8(11):e1641390. doi: 10.1080/2162402X.2019.1641390 (PMC6791454; doi:10.1080/2162402x.2019.1641390), 2019-07-13
Supplement: koni-08-11-1641390-s001.pdf [file koni-08-11-1641390-s001.pdf]

| Antigen   | Fluor     | Clone       | Isotype   | Supplier        | Catalog #   | Antibody Registry | Panel   | Dilution |
|-----------|-----------|-------------|-----------|-----------------|-------------|-------------------|---------|----------|
| CD45      | FITC      | REA737      | hu IgG1   | Miltenyi Biotec | 130-110-796 | AB_2658216        | 1       | 1/200    |
| CD3       | BUV395    | 145-2C11    | ha IgG1   | BD Bioscience   | 563565      | AB_2738278        | 1, 3    | 1/500    |
| CD4       | BV786     | GK1.5       | rat IgG2b | BD Bioscience   | 563331      | AB_2738140        | 1, 3    | 1/200    |
| CD8       | BV480     | 53-6.7      | rat IgG2a | BD Bioscience   | 566096      | AB_2739500        | 1       | 1/200    |
| CD25      | BV421     | PC61        | rat IgG1  | Biolegend       | 102043      | AB_2562611        | 1       | 1/200    |
| FoxP3     | AF647     | 150D        | ms IgG1   | Biolegend       | 320013      | AB_439749         | 1       | 1/100    |
| ICOS      | PE-Cy7    | C398.4A     | ha IgG    | Biolegend       | 313519      | AB_10641839       | 1       | 1/200    |
| Ki67      | PE        | B56         | ms IgG1   | BD Bioscience   | 556027      | AB_2266296        | 1       | 1/100    |
| CD335     | BV711     | 29A1.4      | rat IgG2a | Biolegend       | 137621      | AB_2563289        | 1       | 1/200    |
| B220      | APCVio770 | REA755      | hu IgG1   | Miltenyi Biotec | 130-110-849 | AB_2658286        | 1       | 1/100    |
| CD45      | BUV395    | 30-F11      | rat IgG2b | BD Bioscience   | 564279      | AB_2651134        | 2       | 1/250    |
| F4/80     | BV421     | BM8         | rat IgG2a | Biolegend       | 123131      | AB_10901171       | 2       | 1/200    |
| Ly6C      | BV510     | HK1.4       | rat IgG2c | Biolegend       | 128033      | AB_2562351        | 2       | 1/400    |
| CD11c     | eV605     | N418        | ha IgG    | Biolegend       | 117333      | AB_11204262       | 2       | 1/200    |
| CD117     | BV711     | 2B8         | rat IgG2b | Biolegend       | 105835      | AB_2565956        | 2       | 1/500    |
| Ki67      | Vio515    | REA183      | hu IgG1   | Miltenyi Biotec | 130-108-856 | AB_2652560        | 2       | 1/100    |
| Siglec-F  | PE        | REA798      | hu IgG1   | Miltenyi Biotec | 130-112-332 | AB_2653439        | 2       | 1/400    |
| CD11b     | APC       | REA592      | hu IgG1   | Miltenyi Biotec | 130-109-364 | AB_2654646        | 2       | 1/400    |
| Ly6G      | AF700     | 1A8         | rat IgG2a | Biolegend       | 127621      | AB_10640452       | 2       | 1/400    |
| MHCII     | APC-ef780 | M5/114.15.2 | rat IgG2b | BD Bioscience   | 47-5321-80  | AB_1548792        | 2       | 1/200    |
| CD8       | AF700     | 53-6.7      | rat IgG2a | BD Bioscience   | 557959      | AB_396959         | 3       | 1/200    |
| CD25      | BV510     | PC61        | rat IgG1  | Biolegend       | 102041      | AB_2562269        | 3       | 1/200    |
| FoxP3     | FITC      | FJK-16s     | rat IgG2a | eBioscience     | 11-5773-82  | AB_465243         | 3       | 1/100    |
| GITR      | BV711     | DTA-1       | rat IgG2b | BD Bioscience   | 563390      | AB_2738176        | 3       | 1/400    |
| OX40      | APC       | OX-86       | rat IgG1  | Biolegend       | 119413      | AB_2561723        | 3       | 1/200    |
| TIM3      | PE        | B8.2C12     | rat IgG1  | Biolegend       | 134004      | AB_1626177        | 3       | 1/200    |
| PD-1      | PECF594   | J43         | ha IgG2   | BD Bioscience   | 562523      | AB_2737634        | 3       | 1/400    |
| Viability | Zombie UV | -           | -         | Biolegend       | 423108      | -                 | 1, 2, 3 | 1/1000   |

### Supplementary Table 1: Flow cytometry panels

Phenotypic markers and associated fluorophores for the 3 flow cytometry panels used.

Abbreviations: ms = mouse, ha = hamster, hu = human.

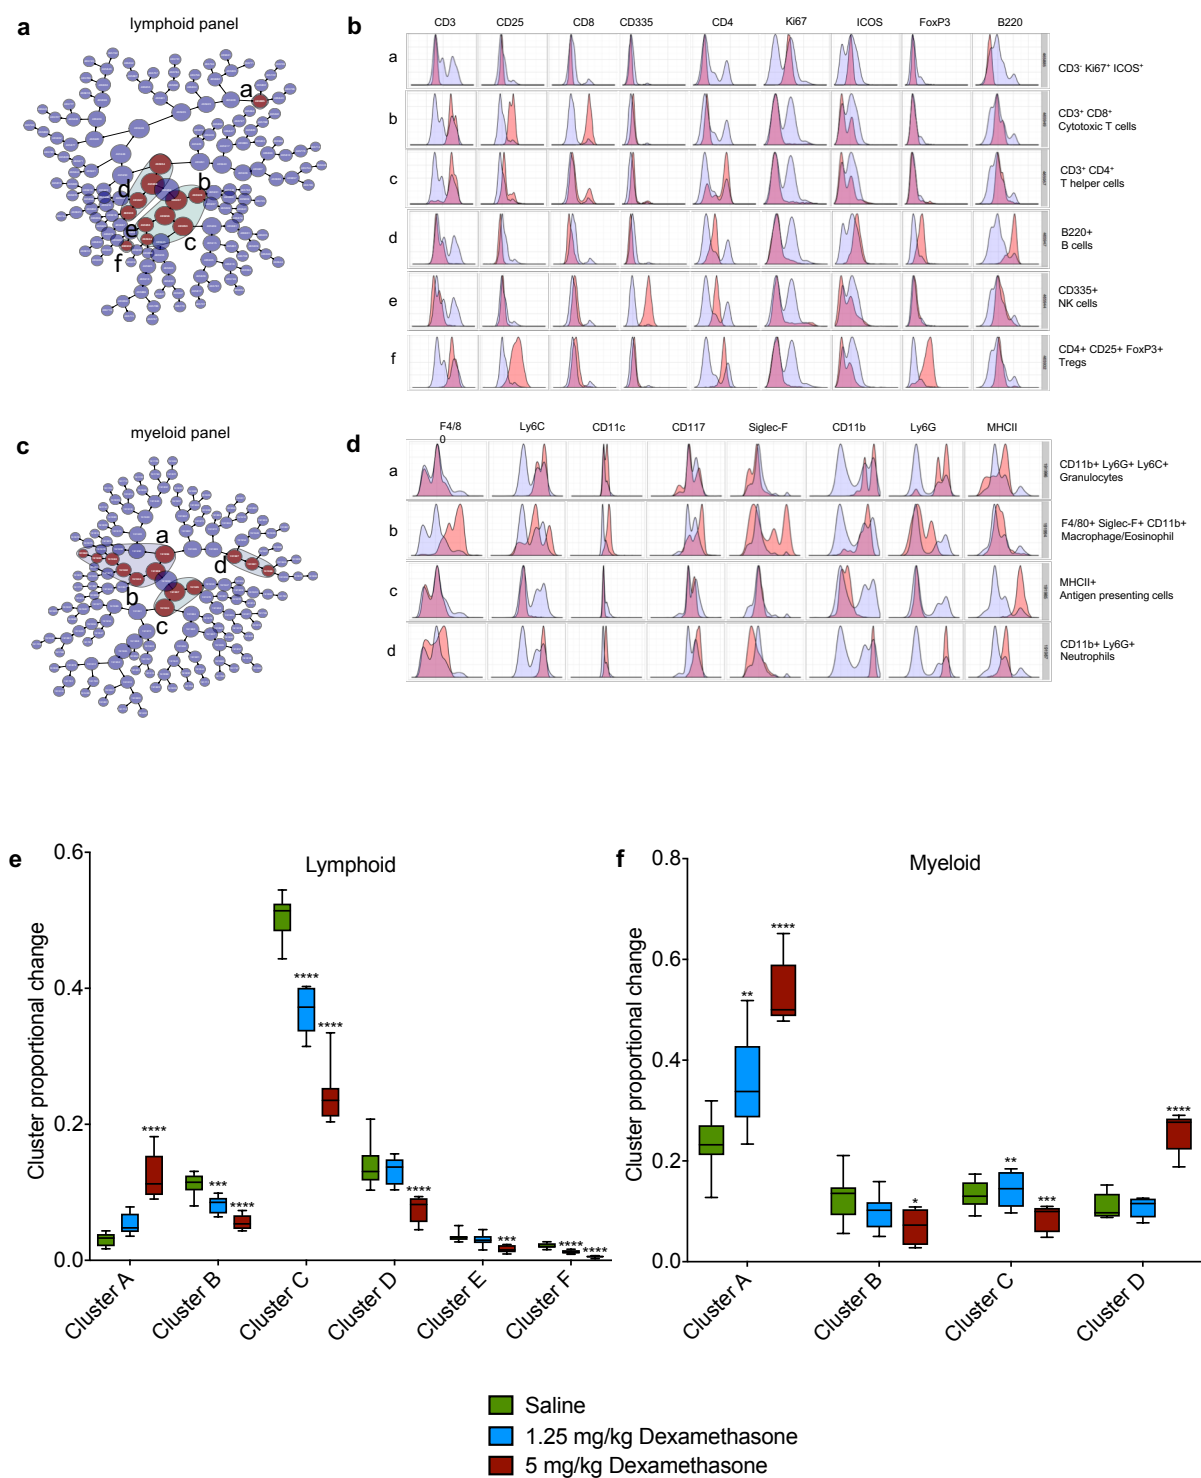

**Supplementary Fig 1: CITRUS analysis identifies distinct differences in immune cell clusters in tumour after dexamethasone administration.**

An unsupervised CITRUS analysis was performed to determine if there are differences between immune subsets within solid tumours after receiving dexamethasone. **A**, Hierarchy plots of stratifying features and **B**, corresponding markers of a lymphoid panel and **C**, hierarchy plots and **D**, markers for a myeloid FACS panel. Subsets that are differentially present in dexamethasone-treated mice are depicted in red. Proportional changes of **E**, lymphoid and **F**, myeloid clusters are shown. \* $p < 0.05$ , \*\* $p < 0.01$ , \*\*\* $p < 0.001$ .

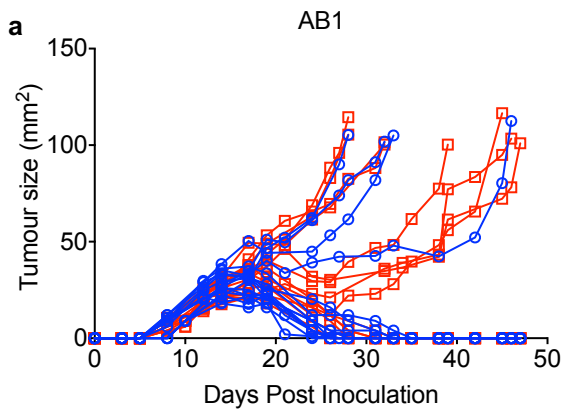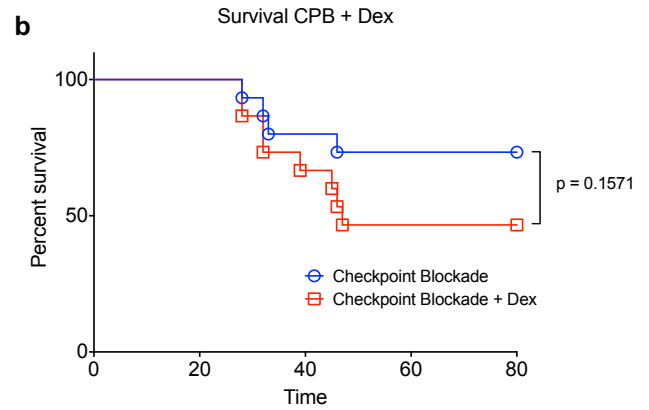

**Supplementary Fig 2: Dexamethasone has an inhibitory effect on the efficacy of checkpoint blockade.**

**A**, Individual growth curves and **B**, survival plot of anti-CTLA4/anti-PD-L1, with or without dexamethasone in s.c. AB1 mesothelioma-bearing BALB/c mice. Mixed model analysis of variance performed on tumour growth and log rank (Mantel-Cox) analysis performed on survival curve.

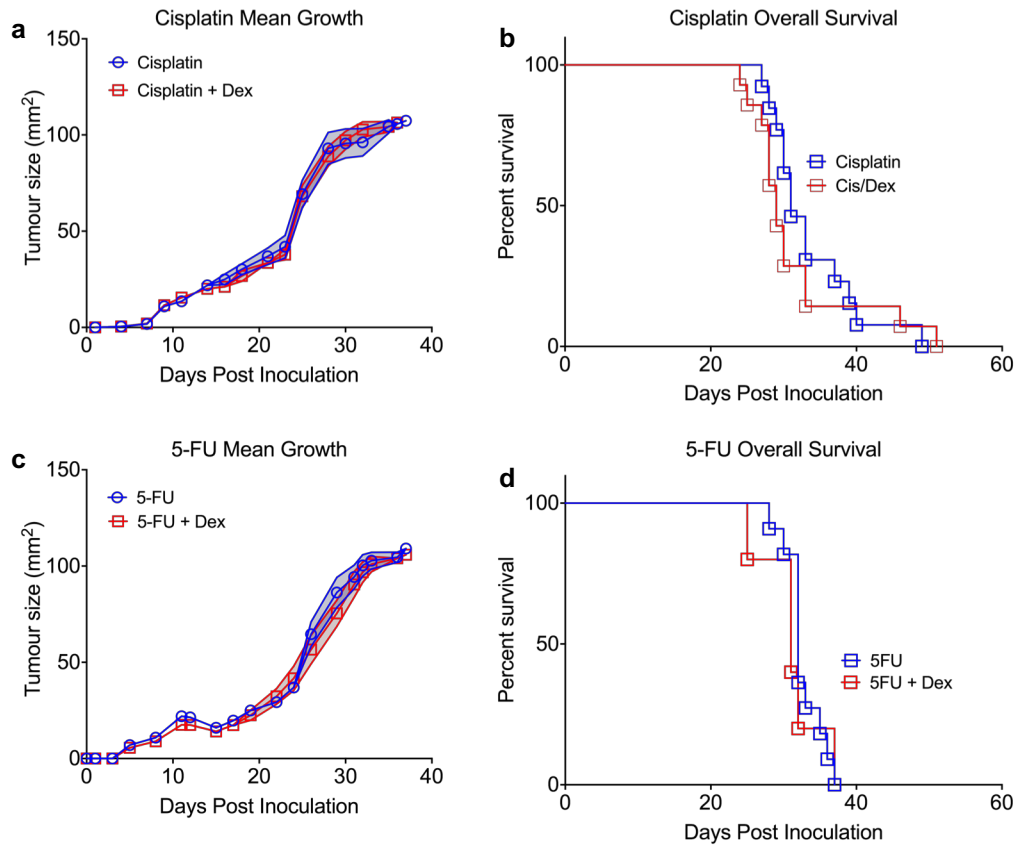

**Supplementary Fig 3: Dexamethasone does not effect response to chemotherapy.**

**A**, Individual growth curves and **B**, survival plot of cisplatin and **C**, Individual growth curves and **D**, survival plot of 5-FU, with or without dexamethasone in s.c. AB1 mesothelioma-bearing BALB/c mice. Mixed model analysis of variance performed on tumour growth and log rank (Mantel-Cox) analysis performed on survival curve.

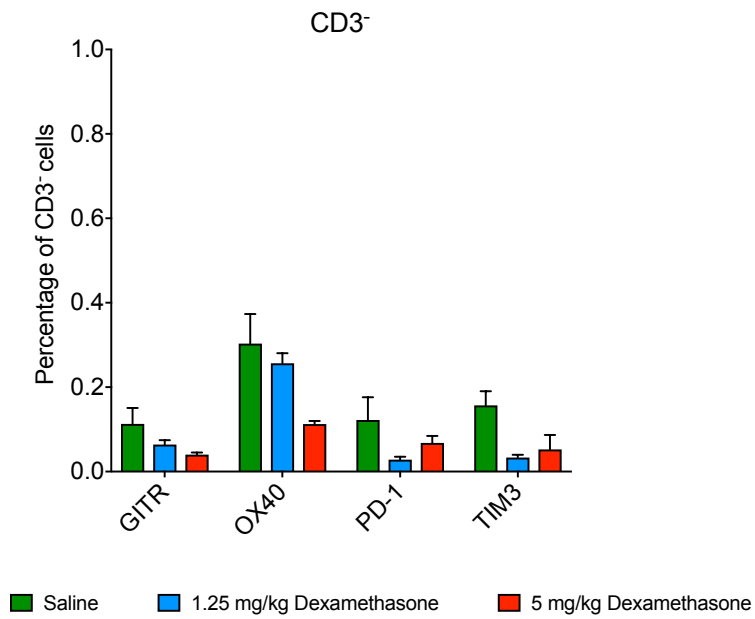

**Supplementary Fig 4: CD3<sup>-</sup> cells do not express significant levels of immune checkpoint molecules.**

Expression of select immune checkpoint molecules on CD3<sup>-</sup> intratumoural cells.
